# Supplementary material
Source: publisher site journal article supplement (https://www.dovepress.com/article/349401)
Supplement: Supplementary file 1 [file get_supplementary_file.php]

**Supplementary Table 1. Abbreviations corresponding to all indicators**

| **Phenotypes** | **Position** | **Class** | **Severity** | **Index** |
| --- | --- | --- | --- | --- |
| DFWSMD | DF (right dorsal forearm) | Wrinkles | Small | maximum depth (mm) |
| DFWMMD | DF (right dorsal forearm) | Wrinkles | Middle | maximum depth (mm) |
| DFWMO | DF (right dorsal forearm) | Wrinkles | Middle | volume of depressions (mm3) |
| DFWSO | DF (right dorsal forearm) | Wrinkles | Small | volume of depressions (mm3) |
| FHWMO | FH (forehead) | Wrinkles | Middle | volume of depressions (mm3) |
| FHWMMD | FH (forehead) | Wrinkles | Middle | maximum depth (mm) |
| FHWSO | FH (forehead) | Wrinkles | Small | volume of depressions (mm3) |
| FHWSMD | FH (forehead) | Wrinkles | Small | maximum depth (mm) |
| HBWSO | HB (back of the right hand) | Wrinkles | Small | volume of depressions (mm3) |
| HBWMO | HB (back of the right hand) | Wrinkles | Middle | volume of depressions (mm3) |
| HBWSMD | HB (back of the right hand) | Wrinkles | Small | maximum depth (mm) |
| HBWMMD | HB (back of the right hand) | Wrinkles | Middle | maximum depth (mm) |
| NFWSMD | NF (front of the neck) | Wrinkles | Small | maximum depth (mm) |
| NFWSO | NF (front of the neck) | Wrinkles | Small | volume of depressions (mm3) |
| NFWMO | NF (front of the neck) | Wrinkles | Middle | volume of depressions (mm3) |
| NFWMMD | NF (front of the neck) | Wrinkles | Middle | maximum depth (mm) |
| NSWSMD | NS (right side of the neck) | Wrinkles | Small | maximum depth (mm) |
| NSWSO | NS (right side of the neck) | Wrinkles | Small | volume of depressions (mm3) |
| NSWMO | NS (right side of the neck) | Wrinkles | Middle | volume of depressions (mm3) |
| NSWMMD | NS (right side of the neck) | Wrinkles | Middle | maximum depth (mm) |
| RETWSO | RET (right corner of the eye) | Wrinkles | Small | volume of depressions (mm3) |
| RETWSMD | RET (right corner of the eye) | Wrinkles | Small | maximum depth (mm) |
| RFWSO | RF (right cheek) | Wrinkles | Small | volume of depressions (mm3) |
| RFWMO | RF (right cheek) | Wrinkles | Middle | volume of depressions (mm3) |
| RFWSMD | RF (right cheek) | Wrinkles | Middle | maximum depth (mm) |
| RFWMMD | RF (right cheek) | Wrinkles | Middle | maximum depth (mm) |
| RMWMMD | RM (right corner of the mouth) | Wrinkles | Middle | maximum depth (mm) |
| RMWMO | RM (right corner of the mouth) | Wrinkles | Middle | volume of depressions (mm3) |
| VFWMO | VF (right volar forearm) | Wrinkles | Middle | volume of depressions (mm3) |
| VFWSO | VF (right volar forearm) | Wrinkles | Small | volume of depressions (mm3) |
| VFWSMD | VF (right volar forearm) | Wrinkles | Small | maximum depth (mm) |
| VFWMMD | VF (right volar forearm) | Wrinkles | Middle | maximum depth (mm) |
| DFTSRa | DF (right dorsal forearm) | Texture | Small | average roughness |
| DFTSRq | DF (right dorsal forearm) | Texture | Small | root mean squared roughness |
| DFTSR1 | DF (right dorsal forearm) | Texture | Small | elevation span |
| DFTMRq | DF (right dorsal forearm) | Texture | Middle | root mean squared roughness |
| DFTMR1 | DF (right dorsal forearm) | Texture | Middle | elevation span |
| DFTMRa | DF (right dorsal forearm) | Texture | Middle | average roughness |
| HBTSRa | HB (back of the right hand) | Texture | Small | average roughness |
| HBTSRq | HB (back of the right hand) | Texture | Small | root mean squared roughness |
| HBTSR1 | HB (back of the right hand) | Texture | Small | elevation span |
| HBTMRa | HB (back of the right hand) | Texture | Middle | average roughness |
| HBTMRq | HB (back of the right hand) | Texture | Middle | root mean squared roughness |
| HBTMR1 | HB (back of the right hand) | Texture | Middle | elevation span |
| VFTSRa | VF (right volar forearm) | Texture | Small | average roughness |
| VFTSRq | VF (right volar forearm) | Texture | Small | root mean squared roughness |
| VFTMR1 | VF (right volar forearm) | Texture | Middle | elevation span |
| VFTSR1 | VF (right volar forearm) | Texture | Small | elevation span |
| VFTMRq | VF (right volar forearm) | Texture | Middle | root mean squared roughness |
| VFTMRa | VF (right volar forearm) | Texture | Middle | average roughness |
| DF.LEB | DF (right dorsal forearm) | Ultrasound(Structure) | / | the gap between epidermis and dermis (um) |
| DF.Intensity | DF (right dorsal forearm) | Ultrasound(Structure) | / | collagen content |
| DF.Thickness | DF (right dorsal forearm) | Ultrasound(Structure) | / | dermis thickness |
| FH.melanin | FH (forehead) | Ultrasound(Structure) | / | collagen content |
| FH.Intensity | FH (forehead) | Ultrasound(Structure) | / | collagen content |
| FH.LEB | FH (forehead) | Ultrasound(Structure) | / | the gap between epidermis and dermis (um) |
| FH.Thickness | FH (forehead) | Ultrasound(Structure) | / | dermis thickness |
| HB.Intensity | HB (back of the right hand) | Ultrasound(Structure) | / | collagen content |
| HB.LEB | HB (back of the right hand) | Ultrasound(Structure) | / | the gap between epidermis and dermis (um) |
| HB.Thickness | HB (back of the right hand) | Ultrasound(Structure) | / | dermis thickness |
| NF.Intensity | NF (front of the neck) | Ultrasound(Structure) | / | collagen content |
| NF.LEB | NF (front of the neck) | Ultrasound(Structure) | / | the gap between epidermis and dermis (um) |
| NF.Thickness | NF (front of the neck) | Ultrasound(Structure) | / | dermis thickness |
| NS.Intensity | NS (right side of the neck) | Ultrasound(Structure) | / | collagen content |
| NS.Thickness | NS (right side of the neck) | Ultrasound(Structure) | / | dermis thickness |
| NS.LEB | NS (right side of the neck) | Ultrasound(Structure) | / | the gap between epidermis and dermis (um) |
| RET.Intensity | RET (right corner of the eye) | Ultrasound(Structure) | / | collagen content |
| RET.LEB | RET (right corner of the eye) | Ultrasound(Structure) | / | the gap between epidermis and dermis (um) |
| RET.Thickness | RET (right corner of the eye) | Ultrasound(Structure) | / | dermis thickness |
| RF.melanin | RF (right cheek) | Ultrasound(Structure) | / | collagen content |
| RF.Intensity | RF (right cheek) | Ultrasound(Structure) | / | collagen content |
| RF.LEB | RF (right cheek) | Ultrasound(Structure) | / | the gap between epidermis and dermis (um) |
| RF.Thickness | RF (right cheek) | Ultrasound(Structure) | / | dermis thickness |
| RM.Intensity | RM (right corner of the mouth) | Ultrasound(Structure) | / | collagen content |
| RM.LEB | RM (right corner of the mouth) | Ultrasound(Structure) | / | the gap between epidermis and dermis (um) |
| RM.Thickness | RM (right corner of the mouth) | Ultrasound(Structure) | / | dermis thickness |
| UE.Intensity | UE (under eye) | Ultrasound(Structure) | / | collagen content |
| UE.Thickness | UE (under eye) | Ultrasound(Structure) | / | dermis thickness |
| UE.LEB | UE (under eye) | Ultrasound(Structure) | / | the gap between epidermis and dermis (um) |
| VF.Intensity | VF (right volar forearm) | Ultrasound(Structure) | / | collagen content |
| VF.LEB | VF (right volar forearm) | Ultrasound(Structure) | / | the gap between epidermis and dermis (um) |
| VF.Thickness | VF (right volar forearm) | Ultrasound(Structure) | / | dermis thickness |

**Supplementary Table 2. Spearman correlation between physiological age and all measured phenotypes**

| **Phenotypes** | **Spearman's coefficient** | **p** | **Position** | **Class** |
| --- | --- | --- | --- | --- |
| DFWSMD | 0.27 | 4.94E-07 | DF | Wrinkles |
| DFWMMD | 0.20 | 3.63E-04 | DF | Wrinkles |
| DFWMO | 0.19 | 4.94E-04 | DF | Wrinkles |
| DFWSO | 0.16 | 3.01E-03 | DF | Wrinkles |
| FHWMO | 0.47 | 4.45E-19 | FH | Wrinkles |
| FHWMMD | 0.43 | 5.73E-16 | FH | Wrinkles |
| FHWSO | 0.43 | 5.87E-16 | FH | Wrinkles |
| FHWSMD | 0.39 | 1.40E-13 | FH | Wrinkles |
| HBWSO | 0.77 | 2.05E-64 | HB | Wrinkles |
| HBWMO | 0.67 | 2.89E-43 | HB | Wrinkles |
| HBWSMD | 0.63 | 1.04E-36 | HB | Wrinkles |
| HBWMMD | 0.39 | 1.73E-13 | HB | Wrinkles |
| NFWSMD | 0.25 | 4.79E-06 | NF | Wrinkles |
| NFWSO | 0.20 | 2.02E-04 | NF | Wrinkles |
| NFWMO | 0.20 | 2.90E-04 | NF | Wrinkles |
| NFWMMD | 0.03 | 5.66E-01 | NF | Wrinkles |
| NSWSMD | 0.29 | 6.50E-08 | NS | Wrinkles |
| NSWSO | 0.28 | 2.81E-07 | NS | Wrinkles |
| NSWMO | 0.23 | 3.73E-05 | NS | Wrinkles |
| NSWMMD | 0.10 | 6.16E-02 | NS | Wrinkles |
| RETWSO | 0.64 | 2.96E-39 | RET | Wrinkles |
| RETWSMD | 0.61 | 2.29E-34 | RET | Wrinkles |
| RFWSO | 0.28 | 4.50E-07 | RF | Wrinkles |
| RFWMO | 0.19 | 6.53E-04 | RF | Wrinkles |
| RFWSMD | 0.03 | 5.41E-01 | RF | Wrinkles |
| RFWMMD | -0.02 | 6.56E-01 | RF | Wrinkles |
| RMWMMD | 0.65 | 8.43E-41 | RM | Wrinkles |
| RMWMO | 0.64 | 2.50E-38 | RM | Wrinkles |
| VFWMO | 0.46 | 1.53E-18 | VF | Wrinkles |
| VFWSO | 0.42 | 2.03E-15 | VF | Wrinkles |
| VFWSMD | 0.40 | 6.48E-14 | VF | Wrinkles |
| VFWMMD | 0.13 | 1.93E-02 | VF | Wrinkles |
| DFTSRa | 0.20 | 4.02E-04 | DF | Texture |
| DFTSRq | 0.19 | 4.61E-04 | DF | Texture |
| DFTSR1 | 0.18 | 1.08E-03 | DF | Texture |
| DFTMRq | -0.13 | 1.51E-02 | DF | Texture |
| DFTMR1 | -0.10 | 7.30E-02 | DF | Texture |
| DFTMRa | -0.02 | 7.05E-01 | DF | Texture |
| HBTSRa | 0.77 | 9.72E-64 | HB | Texture |
| HBTSRq | 0.76 | 1.25E-63 | HB | Texture |
| HBTSR1 | 0.65 | 2.09E-40 | HB | Texture |
| HBTMRa | 0.65 | 2.25E-40 | HB | Texture |
| HBTMRq | 0.60 | 2.19E-33 | HB | Texture |
| HBTMR1 | 0.47 | 5.31E-19 | HB | Texture |
| VFTSRa | 0.44 | 1.18E-16 | VF | Texture |
| VFTSRq | 0.42 | 1.39E-15 | VF | Texture |
| VFTMR1 | -0.23 | 2.98E-05 | VF | Texture |
| VFTSR1 | 0.20 | 2.71E-04 | VF | Texture |
| VFTMRq | -0.12 | 3.51E-02 | VF | Texture |
| VFTMRa | 0.10 | 6.65E-02 | VF | Texture |
| DF.LEB | 0.64 | 5.64E-28 | DF | Ultrasound(Structure) |
| DF.Intensity | -0.45 | 7.94E-18 | DF | Ultrasound(Structure) |
| DF.Thickness | 0.21 | 1.54E-04 | DF | Ultrasound(Structure) |
| FH.melanin | 0.42 | 5.81E-15 | FH | Ultrasound(Structure) |
| FH.Intensity | -0.16 | 3.82E-03 | FH | Ultrasound(Structure) |
| FH.LEB | 0.25 | 1.30E-01 | FH | Ultrasound(Structure) |
| FH.Thickness | 0.00 | 9.66E-01 | FH | Ultrasound(Structure) |
| HB.Intensity | -0.42 | 3.99E-15 | HB | Ultrasound(Structure) |
| HB.LEB | -0.28 | 5.87E-04 | HB | Ultrasound(Structure) |
| HB.Thickness | 0.16 | 2.89E-03 | HB | Ultrasound(Structure) |
| NF.Intensity | -0.45 | 3.18E-17 | NF | Ultrasound(Structure) |
| NF.LEB | 0.26 | 1.13E-02 | NF | Ultrasound(Structure) |
| NF.Thickness | 0.04 | 5.10E-01 | NF | Ultrasound(Structure) |
| NS.Intensity | -0.49 | 5.12E-21 | NS | Ultrasound(Structure) |
| NS.Thickness | 0.19 | 6.33E-04 | NS | Ultrasound(Structure) |
| NS.LEB | 0.23 | 1.53E-02 | NS | Ultrasound(Structure) |
| RET.Intensity | -0.45 | 1.63E-17 | RET | Ultrasound(Structure) |
| RET.LEB | 0.49 | 6.19E-08 | RET | Ultrasound(Structure) |
| RET.Thickness | 0.13 | 1.54E-02 | RET | Ultrasound(Structure) |
| RF.melanin | 0.64 | 1.62E-39 | RF | Ultrasound(Structure) |
| RF.Intensity | -0.26 | 3.00E-06 | RF | Ultrasound(Structure) |
| RF.LEB | 0.22 | 1.32E-01 | RF | Ultrasound(Structure) |
| RF.Thickness | 0.03 | 5.35E-01 | RF | Ultrasound(Structure) |
| RM.Intensity | -0.12 | 2.52E-02 | RM | Ultrasound(Structure) |
| RM.LEB | 0.43 | 6.09E-02 | RM | Ultrasound(Structure) |
| RM.Thickness | 0.06 | 2.47E-01 | RM | Ultrasound(Structure) |
| UE.Intensity | -0.26 | 2.96E-03 | UE | Ultrasound(Structure) |
| UE.Thickness | 0.14 | 1.13E-01 | UE | Ultrasound(Structure) |
| UE.LEB | 0.16 | 3.69E-01 | UE | Ultrasound(Structure) |
| VF.Intensity | -0.49 | 1.11E-20 | VF | Ultrasound(Structure) |
| VF.LEB | 0.40 | 3.81E-09 | VF | Ultrasound(Structure) |
| VF.Thickness | 0.22 | 5.86E-05 | VF | Ultrasound(Structure) |

**Supplementary Table 3. Comparison of all measured phenotypes among Young, Presenile, Middle and Old group**

| **Phenotype** | **Young** | **Presenile** | **Middle** | **Old** | **p(Presenile)** | **p(Middle)** | **p(Old)** |
| --- | --- | --- | --- | --- | --- | --- | --- |
| DFWMMD | 0.06(0.05-0.07) | 0.06(0.05-0.07) | 0.07(0.05-0.07) | 0.10(0.08-0.10) | 0.657 | 0.385 | 1.65E-04 |
| DFWMO | 8.46(7.32-9.03) | 8.58(7.35-9.75) | 8.57(7.55-9.29) | 10.71(9.61-11.37) | 0.655 | 0.117 | 0.001 |
| DFWSMD | 0.04(0.03-0.05) | 0.04(0.04-0.05) | 0.05(0.04-0.05) | 0.07(0.06-0.08) | 0.391 | 0.051 | 1.70E-05 |
| DFWSO | 5.86(5.01-6.27) | 5.92(5.17-6.52) | 5.86(5.23-6.30) | 7.57(6.62-7.90) | 0.442 | 0.265 | 1.55E-04 |
| FHWMMD | 0.08(0.06-0.09) | 0.09(0.06-0.10) | 0.11(0.07-0.12) | 0.22(0.20-0.24) | 0.210 | 4.56E-05 | 1.04E-06 |
| FHWMO | 9.67(8.24-10.03) | 9.79(8.75-10.76) | 11.48(9.52-12.87) | 18.09(14.82-22.97) | 0.230 | 1.36E-06 | 1.14E-06 |
| FHWSMD | 0.05(0.04-0.05) | 0.05(0.04-0.06) | 0.06(0.05-0.07) | 0.12(0.10-0.13) | 0.666 | 0.001 | 9.87E-07 |
| FHWSO | 5.87(5.20-6.25) | 5.92(5.34-6.50) | 6.66(5.69-7.31) | 9.20(8.09-10.12) | 0.548 | 1.45E-05 | 1.60E-06 |
| HBWMMD | 0.13(0.08-0.15) | 0.13(0.10-0.16) | 0.17(0.11-0.21) | 0.36(0.25-0.48) | 0.339 | 3.19E-05 | 2.86E-06 |
| HBWMO | 10.48(8.46-11.60) | 11.23(9.14-12.56) | 16.04(11.62-19.42) | 45.27(27.45-64.49) | 0.144 | 4.44E-14 | 1.94E-07 |
| HBWSMD | 0.05(0.04-0.06) | 0.06(0.05-0.06) | 0.08(0.06-0.09) | 0.19(0.12-0.24) | 0.188 | 9.92E-14 | 1.90E-07 |
| HBWSO | 5.84(5.12-6.46) | 6.14(5.42-6.67) | 8.68(7.04-9.53) | 22.31(17.52-27.03) | 0.084 | 3.76E-20 | 1.94E-07 |
| NFWMMD | 0.15(0.09-0.17) | 0.16(0.12-0.18) | 0.14(0.10-0.17) | 0.21(0.13-0.27) | 0.158 | 0.522 | 0.018 |
| NFWMO | 12.47(10.94-13.71) | 14.55(12.16-16.84) | 14.01(11.45-15.97) | 20.92(15.94-23.64) | 6.62E-05 | 0.002 | 1.53E-05 |
| NFWSMD | 0.05(0.04-0.06) | 0.07(0.05-0.07) | 0.06(0.05-0.07) | 0.11(0.09-0.13) | 5.84E-05 | 3.87E-05 | 1.71E-06 |
| NFWSO | 7.04(6.08-7.74) | 7.92(6.79-8.82) | 7.63(6.56-8.59) | 11.68(9.78-13.08) | 0.001 | 0.007 | 1.35E-06 |
| NSWMMD | 0.14(0.09-0.18) | 0.15(0.10-0.17) | 0.14(0.10-0.16) | 0.21(0.18-0.23) | 0.272 | 0.479 | 0.002 |
| NSWMO | 12.45(10.85-14.07) | 13.65(11.34-15.53) | 13.67(11.40-15.57) | 19.50(16.58-21.91) | 0.019 | 0.009 | 3.98E-06 |
| NSWSMD | 0.06(0.05-0.06) | 0.06(0.05-0.07) | 0.06(0.05-0.07) | 0.11(0.09-0.13) | 0.132 | 0.004 | 3.09E-06 |
| NSWSO | 6.92(6.07-7.61) | 7.54(6.62-8.39) | 7.59(6.50-8.43) | 11.18(9.96-12.51) | 0.008 | 0.005 | 6.21E-07 |
| RETWSMD | 0.04(0.03-0.05) | 0.05(0.03-0.05) | 0.06(0.04-0.08) | 0.17(0.13-0.20) | 0.036 | 4.74E-13 | 2.51E-07 |
| RETWSO | 5.56(4.97-5.85) | 6.18(5.46-6.74) | 7.50(6.21-8.34) | 12.78(9.94-13.77) | 5.38E-05 | 4.40E-17 | 2.55E-07 |
| RFWMMD | 0.09(0.06-0.10) | 0.09(0.07-0.10) | 0.08(0.06-0.10) | 0.16(0.12-0.19) | 0.992 | 0.425 | 0.001 |
| RFWMO | 8.89(7.82-9.75) | 9.18(8.20-9.97) | 9.48(8.25-10.43) | 13.46(10.90-16.02) | 0.106 | 0.008 | 1.92E-05 |
| RFWSMD | 0.06(0.04-0.06) | 0.05(0.04-0.06) | 0.05(0.04-0.06) | 0.11(0.07-0.14) | 0.690 | 0.559 | 1.71E-04 |
| RFWSO | 5.31(4.72-5.66) | 5.50(5.07-5.78) | 5.79(5.16-6.35) | 7.95(6.74-9.70) | 0.049 | 1.43E-04 | 5.08E-06 |
| RMWMMD | 0.07(0.05-0.08) | 0.08(0.06-0.09) | 0.12(0.08-0.15) | 0.30(0.24-0.37) | 0.022 | 9.49E-15 | 6.74E-07 |
| RMWMO | 11.03(8.90-12.61) | 12.64(10.26-13.92) | 18.47(12.44-22.16) | 43.80(29.18-53.42) | 0.012 | 5.62E-15 | 3.98E-06 |
| VFWMMD | 0.05(0.04-0.06) | 0.06(0.04-0.06) | 0.05(0.04-0.05) | 0.08(0.06-0.10) | 0.292 | 0.510 | 4.86E-04 |
| VFWMO | 6.58(6.09-7.07) | 6.78(6.22-7.15) | 7.28(6.56-7.77) | 9.32(8.20-9.47) | 0.181 | 6.63E-08 | 3.34E-07 |
| VFWSMD | 0.03(0.03-0.03) | 0.03(0.03-0.03) | 0.03(0.03-0.04) | 0.06(0.04-0.06) | 0.063 | 1.41E-05 | 1.41E-06 |
| VFWSO | 4.73(4.45-4.97) | 4.91(4.54-5.15) | 5.19(4.74-5.49) | 6.92(6.08-7.20) | 0.033 | 4.43E-07 | 1.04E-06 |
| DFTMR1 | 0.14(0.12-0.17) | 0.14(0.11-0.15) | 0.13(0.10-0.15) | 0.17(0.14-0.19) | 0.489 | 0.004 | 0.010 |
| DFTMRa | 9.40(7.49-10.70) | 9.44(7.75-10.88) | 8.73(7.47-9.58) | 11.75(10.55-12.66) | 0.651 | 0.193 | 0.005 |
| DFTMRq | 13.16(10.34-15.64) | 13.02(10.44-15.55) | 11.60(9.82-12.61) | 15.40(13.80-16.89) | 0.888 | 0.002 | 0.047 |
| DFTSR1 | 0.08(0.06-0.09) | 0.08(0.06-0.09) | 0.08(0.07-0.09) | 0.11(0.09-0.11) | 0.469 | 0.199 | 1.54E-04 |
| DFTSRa | 5.26(4.31-5.74) | 5.35(4.52-5.96) | 5.33(4.61-5.85) | 7.36(6.20-7.67) | 0.321 | 0.122 | 7.74E-05 |
| DFTSRq | 6.74(5.54-7.43) | 6.86(5.81-7.67) | 6.84(5.92-7.54) | 9.42(7.91-9.88) | 0.352 | 0.123 | 8.31E-05 |
| HBTMR1 | 0.18(0.14-0.21) | 0.20(0.15-0.22) | 0.25(0.18-0.30) | 0.53(0.39-0.73) | 0.098 | 2.01E-07 | 5.43E-07 |
| HBTMRa | 10.88(8.34-12.10) | 11.76(9.20-13.12) | 16.84(12.02-20.50) | 50.33(30.55-72.00) | 0.107 | 3.09E-13 | 1.94E-07 |
| HBTMRq | 15.06(11.33-16.92) | 16.29(12.59-19.03) | 22.79(16.14-27.70) | 65.26(39.68-94.57) | 0.105 | 4.11E-11 | 1.94E-07 |
| HBTSR1 | 0.08(0.07-0.09) | 0.08(0.07-0.09) | 0.11(0.09-0.13) | 0.25(0.19-0.31) | 0.283 | 1.69E-14 | 1.93E-07 |
| HBTSRa | 5.38(4.56-6.19) | 5.74(4.93-6.33) | 8.68(6.82-9.73) | 24.03(18.67-29.06) | 0.081 | 2.80E-20 | 1.94E-07 |
| HBTSRq | 6.92(5.85-7.89) | 7.36(6.31-8.10) | 11.09(8.78-12.57) | 30.68(23.52-37.17) | 0.087 | 3.51E-20 | 1.94E-07 |
| VFTMR1 | 0.11(0.09-0.13) | 0.12(0.10-0.14) | 0.10(0.08-0.11) | 0.14(0.12-0.17) | 0.333 | 3.10E-04 | 0.014 |
| VFTMRa | 7.08(6.33-7.70) | 7.57(6.66-8.43) | 7.23(6.50-7.87) | 10.19(8.75-11.06) | 0.024 | 0.439 | 7.00E-06 |
| VFTMRq | 10.23(8.67-11.34) | 10.93(8.86-12.39) | 9.52(8.36-10.20) | 13.32(11.15-14.52) | 0.128 | 0.016 | 0.001 |
| VFTSR1 | 0.06(0.05-0.06) | 0.06(0.05-0.06) | 0.06(0.05-0.06) | 0.09(0.08-0.09) | 0.330 | 0.091 | 9.12E-06 |
| VFTSRa | 4.03(3.70-4.25) | 4.24(3.82-4.55) | 4.59(4.07-4.91) | 6.56(5.61-6.89) | 0.019 | 1.23E-07 | 8.79E-07 |
| VFTSRq | 5.13(4.70-5.46) | 5.40(4.86-5.79) | 5.80(5.14-6.20) | 8.30(7.09-8.75) | 0.033 | 4.63E-07 | 8.79E-07 |
| DF.Intensity | 46.28(38.76-56.60) | 44.74(37.02-52.24) | 31.58(22.41-39.86) | 38.90(34.10-42.90) | 0.401 | 1.40E-10 | 0.051 |
| DF.LEB | 133.13(105.33-151.42) | 167.24(118.50-190.92) | 233.35(171.17-276.50) | 348.92(325.88-381.83) | 0.004 | 2.09E-10 | 1.35E-05 |
| DF.Thickness | 1148.32(1013.83-1211.33) | 1146.30(1043.46-1224.50) | 1220.25(1066.50-1356.17) | 1243.65(1158.67-1343.00) | 0.890 | 0.012 | 0.055 |
| FH.Intensity | 18.86(13.44-23.13) | 18.34(12.32-22.02) | 17.78(11.99-21.05) | 13.17(9.41-18.00) | 0.491 | 0.052 | 0.003 |
| FH.LEB | NA | NA | NA | NA | NA | NA | NA |
| FH.melanin | 0.60±0.07 | 0.61±0.06 | 0.65±0.06 | 0.69±0.04 | 0.524 | 3.75E-06 | 2.51E-05 |
| FH.Thickness | 1396.37±202.98 | 1389.99±175.09 | 1371.66±238.85 | 1510.58±227.45 | 0.855 | 0.444 | 0.145 |
| HB.Intensity | 38.43(31.58-43.97) | 40.89(33.02-49.30) | 29.70(22.16-37.24) | 27.49(24.71-31.76) | 0.310 | 1.08E-06 | 0.001 |
| HB.LEB | 340.14(302.83-381.83) | 299.63(223.83-342.33) | 296.25(250.17-342.33) | NA | 0.033 | 0.001 | NA |
| HB.Thickness | 949.65(855.83-994.08) | 935.23(816.33-961.17) | 1032.62(852.54-1125.75) | 1038.97(934.83-1059.92) | 0.231 | 0.070 | 0.173 |
| NF.Intensity | 42.21(30.52-51.37) | 41.23(32.96-47.68) | 30.26(23.87-36.43) | 25.94(22.36-28.94) | 0.764 | 1.91E-08 | 1.66E-04 |
| NF.LEB | 187.63(92.17-167.88) | 228.41(92.17-368.67) | 255.17(134.96-371.96) | 297.90(204.08-362.08) | 0.316 | 0.043 | 0.030 |
| NF.Thickness | 1157.96(1033.58-1264.00) | 1146.30(1010.54-1234.38) | 1175.13(1000.67-1303.50) | 1278.36(1211.33-1336.42) | 0.544 | 0.822 | 0.045 |
| NS.Intensity | 43.88(34.79-51.46) | 41.34(34.67-49.98) | 31.21(23.42-37.12) | 22.11(15.78-28.79) | 0.292 | 1.24E-09 | 2.80E-05 |
| NS.LEB | 225.38(92.17-381.83) | 221.20(105.33-342.33) | 258.21(118.50-381.83) | 342.33(316.00-381.83) | 0.679 | 0.131 | 0.193 |
| NS.Thickness | 1212.98±202.27 | 1200.16±147.49 | 1264.48±205.13 | 1517.76±157.57 | 0.695 | 0.098 | 3.21E-05 |
| RET.Intensity | 34.74(26.69-42.37) | 33.75(26.92-39.34) | 24.93(18.13-29.57) | 21.43(18.73-23.75) | 0.496 | 5.15E-09 | 7.75E-05 |
| RET.LEB | 218.57(187.63-246.88) | 245.63(197.50-276.50) | 318.75(263.33-375.25) | 381.83(302.83-460.83) | 0.686 | 0.001 | 0.047 |
| RET.Thickness | 1195.11(1040.17-1290.33) | 1204.95(1040.17-1277.17) | 1263.93(1092.83-1398.96) | 1331.03(1237.67-1448.33) | 0.959 | 0.028 | 0.017 |
| RF.Intensity | 22.10(16.01-27.56) | 20.79(14.86-25.94) | 17.53(12.20-20.71) | 19.71(16.13-20.26) | 0.381 | 8.74E-05 | 0.504 |
| RF.LEB | 241.39±67.57 | 282.35±74.51 | 318.47±87.37 | 276.50±119.23 | 0.428 | 0.175 | 0.644 |
| RF.melanin | 0.53(0.49-0.56) | 0.53(0.50-0.56) | 0.60(0.56-0.63) | 0.73(0.71-0.75) | 0.281 | 1.50E-13 | 2.33E-07 |
| RF.Thickness | 1378.03(1247.54-1494.42) | 1404.64(1277.17-1573.42) | 1430.34(1224.50-1626.08) | 1374.12(1231.08-1448.33) | 0.442 | 0.229 | 0.799 |
| RM.Intensity | 16.93(12.19-20.38) | 14.67(11.17-17.60) | 14.62(10.67-15.72) | 19.66(11.93-26.81) | 0.041 | 0.001 | 0.412 |
| RM.LEB | NA | NA | NA | NA | NA | NA | NA |
| RM.Thickness | 1399.66±206.40 | 1474.47±179.99 | 1467.19±230.55 | 1426.79±193.80 | 0.037 | 0.039 | 0.681 |
| UE.Intensity | 29.25(23.10-39.16) | 26.72(16.24-32.36) | 17.32(11.98-21.52) | 20.23(14.44-26.02) | 0.799 | 0.006 | 0.500 |
| UE.LEB | 329.17±34.84 | 355.50±116.53 | 395.57±94.90 | NA | 0.602 | 0.050 | NA |
| UE.Thickness | 1273.40±414.89 | 1373.10±336.81 | 1376.61±222.96 | 1632.67±391.03 | 0.593 | 0.538 | 0.392 |
| VF.Intensity | 54.31(45.16-66.15) | 55.73(46.81-65.96) | 37.64(25.72-49.32) | 43.53(37.73-53.24) | 0.683 | 5.28E-10 | 0.027 |
| VF.LEB | 203.40(105.33-302.83) | 189.98(118.50-273.21) | 235.10(158.00-302.83) | 338.38(260.04-375.25) | 0.934 | 0.019 | 0.012 |
| VF.Thickness | 1034.05(921.67-1132.33) | 986.70(911.79-1027.00) | 1107.58(957.88-1214.63) | 1139.52(1079.67-1171.83) | 0.058 | 0.054 | 0.041 |

**Notes:** p(Presenile) indicates p value of difference test of Young and Presenile group; p(Middle) indicates p value of difference test of Young and Middle group; p(Old) indicates p value of difference test of Young and Old group. Normally distributed data was presented as mean ± standard deviation (SD), while non-normally distributed data was presented as the median (interquartile range, IQR). NA indicates ineffective sample size in the group to be calculated.
